# Supplementary material for: Benefits of subsidence control for coastal flooding in China
Source: PubMed Central journal article supplement (PMC9663704; doi:10.1038/s41467-022-34525-w), 2022-11-14
Supplement: 41467_2022_34525_MOESM2_ESM.pdf [file 41467_2022_34525_MOESM2_ESM.pdf]

## **Description of Additional Supplementary Files**

File Name: Supplementary Data 1

Description: Contains the observational subsidence values, measurements for subsidence records of coastal China basin obtained through a literature review.
